# Supplementary material for: Accuracy of Bolus and Basal Rate Delivery of Different Insulin Pump Systems
Source: PubMed Central journal article supplement (PMC6477586; doi:10.1089/dia.2018.0376), 2019-03-30
Supplement: Supp_Fig1.pdf [file Supp_Fig1.pdf]

# Supplementary Data

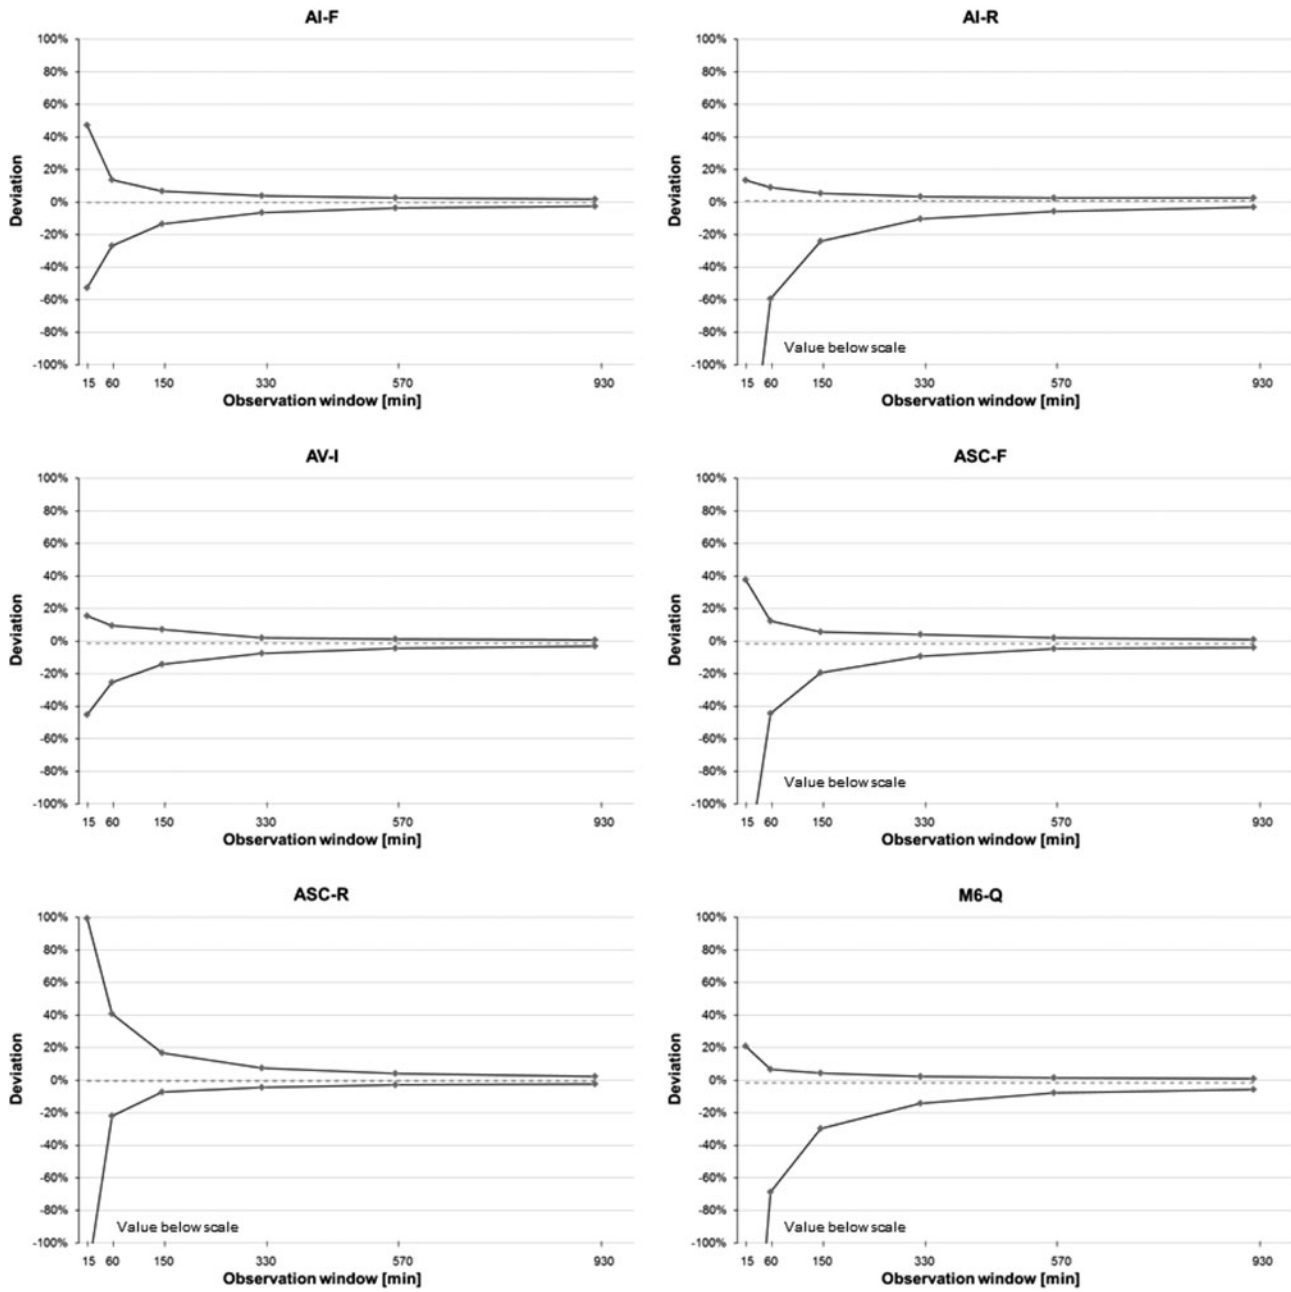

SUPPLEMENTARY FIG. S1. (Continued next page).

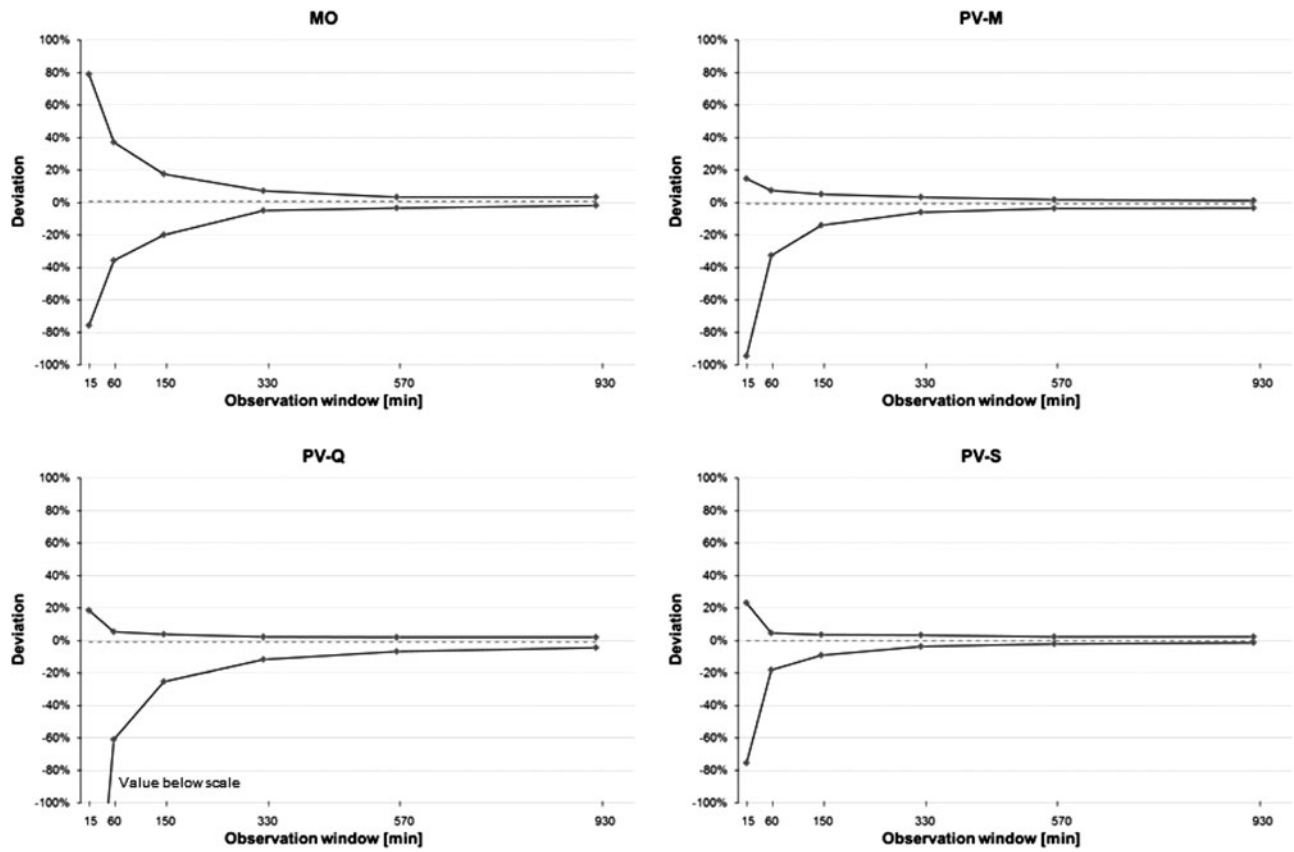

**SUPPLEMENTARY FIG. S1.** Trumpet curves according to IEC 60601-2-24 (first 24 h excluded) for a basal rate of 1 U/h. Connected dots show the minimal and maximal deviation of the nine data sets per insulin pump system within each observation window. Dotted lines show the total deviation for hours 25–72.
